# Supplementary material
Source: PubMed Central journal article supplement (PMC2763937)

**Figure S2.** Effects of SIRT inhibitors on CD41 expression, total-cell expansion, viability, and Mk apoptosis. mPB CD34<sup>+</sup> cells were cultured with 100 ng/mL Tpo. On day 5 cultures were supplemented with **(A-D)** 10  $\mu$ M cambinol or **(E-H)** 10  $\mu$ M AGK2. For comparison, replicate cultures were either supplemented with 6.25 mM NIC on day 5 or maintained with Tpo alone. **(A,E)** The percentage of CD41<sup>+</sup> cells in the viable population. **(B,F)** Total-cell fold-expansion. **(C,G)** The percentage of viable cells in culture. **(D,H)** The percentage of apoptotic Mks in the viable population. Data shown represent the mean  $\pm$  SEM for n = 12 **(A-D)** or n = 11 **(E-H)** experiments. Based on a paired t-test, values of p < 0.0005 (x) and p < 0.05 (\*) are indicated for the various time points in comparison to the Tpo only culture.

**Figure S3.** NIC increases acetylation of nucleosomes. Whole cell lysates were loaded into SDS-PAGE gels. After electrophoresis, the proteins were transferred to nitrocellulose membranes for Western blots. After probing for acetylated lysine residues, the blots were stripped and probed for nucleosomes. Corresponding densitometry analysis is given. The blot shown is representative of four biological experiments.

ACCEPTED MANUSCRIPT

Type of file: figure

Label: 2

Filename: Figure\_S2.tif

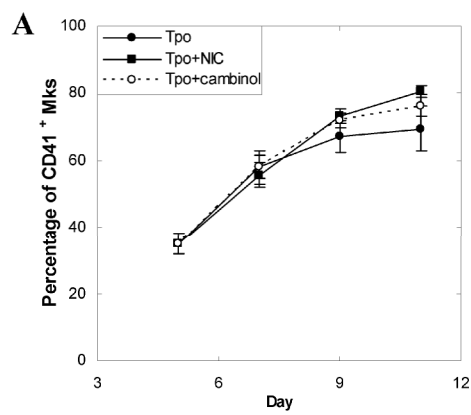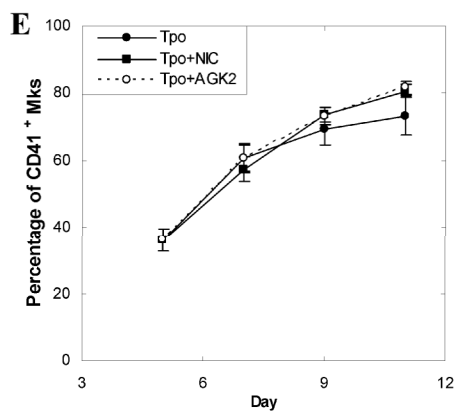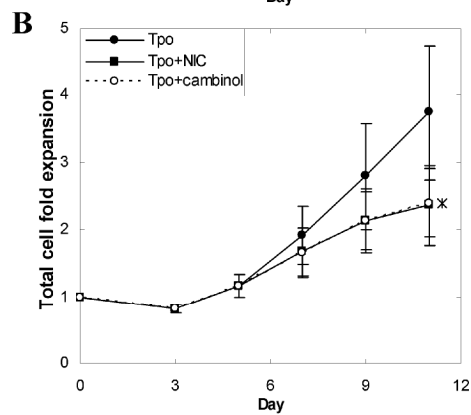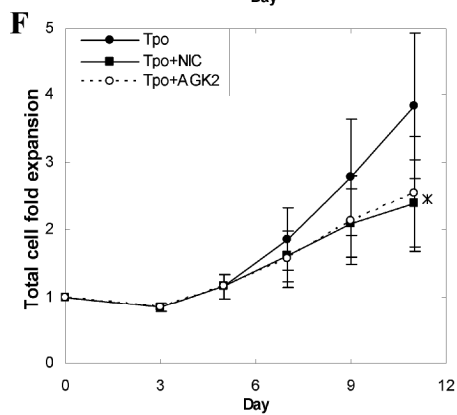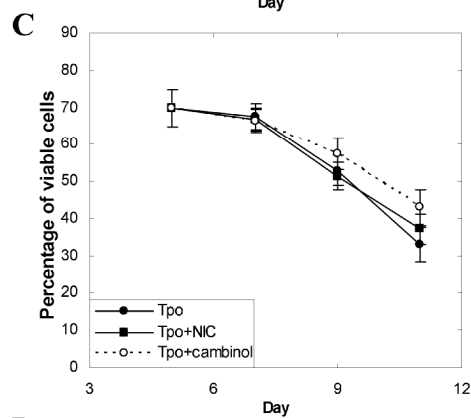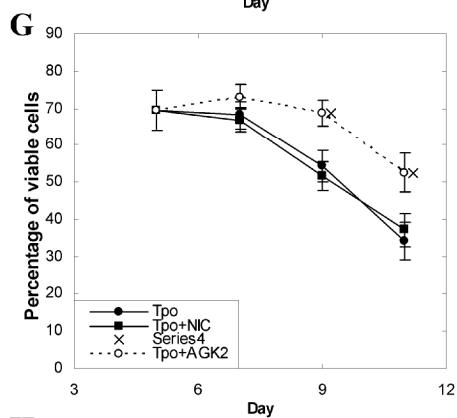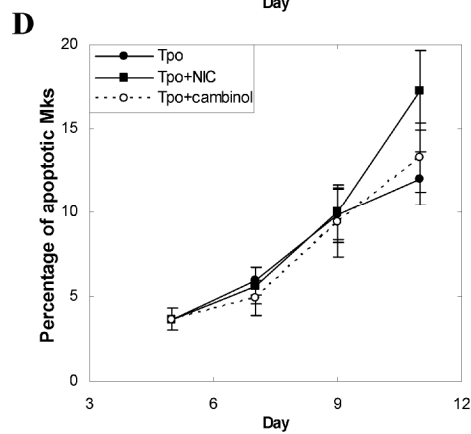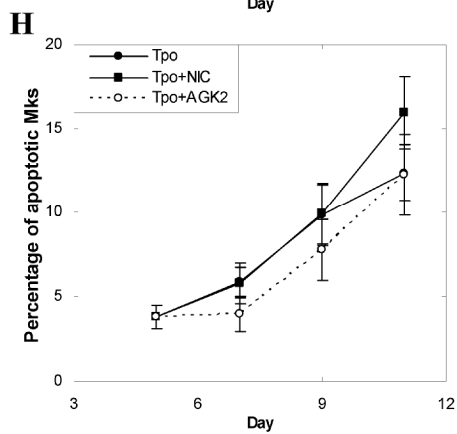

Type of file: figure

Label: 3

Filename: Figure\_S3.tif

Tpo  
Day 6

Tpo  
Day 7

Tpo  
Day 8

Tpo  
Day 9

Tpo+NIC  
Day 6

Tpo+NIC  
Day 7

Tpo+NIC  
Day 8

Tpo+NIC  
Day 9

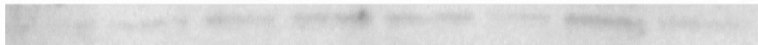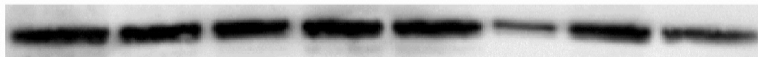

**Acetylated Lysine**

**Nucleosome**

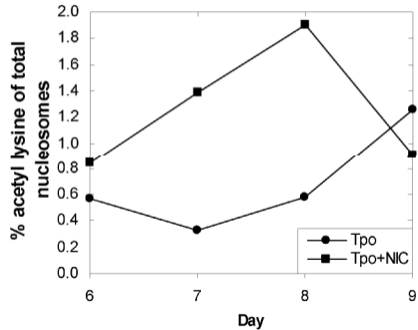

Supplement: NIHMS141764-supplement-2.pdf [file NIHMS141764-supplement-2.pdf]
